# Supplementary material
Source: ML conference proceedings conference paper supplement (https://openaccess.thecvf.com/content/ICCV2021/html/Cai_AskConfirm_Active_Detail_ICCV_2021_paper.html)
Supplement: Supplementary file 2 [file Cai_AskConfirm_Active_Detail_ICCV_2021_supplemental.zip]

Archive with 61 entries (54 files):
- 03273-supp.pdf
- code/
- code/datasets/
- code/datasets/loader.py
- code/datasets/object_stats.py
- code/datasets/precomp_vg_img_feature.py
- code/datasets/precomp_vg_img_feature_global.py
- code/datasets/precomp_vg_img_logits.py
- code/datasets/vg.py
- code/datasets/word_stats.py
- code/models/
- code/models/environment_coherence_global_model.py
- code/models/environment_coherence_model.py
- code/models/environment_rules_model.py
- code/models/image_attribute_model.py
- code/models/image_encoder.py
- code/models/policy_model.py
- code/models/text_encoder.py
- code/models/text_image_matching_global_model.py
- code/models/text_image_matching_model.py
- code/scripts/
- code/scripts/precomp_vg_attr_feature.sh
- code/scripts/precomp_vg_img_feature.sh
- code/scripts/precomp_vg_img_feature_global.sh
- code/scripts/precomp_vg_img_logits.sh
- code/scripts/test_image_attribute.sh
- code/scripts/test_ppo_coherence.sh
- code/scripts/test_ppo_coherence_global.sh
- code/scripts/test_ppo_rules.sh
- code/scripts/test_text_image_matching.sh
- code/scripts/test_text_image_matching_global.sh
- code/scripts/train_image_attribute.sh
- code/scripts/train_ppo_coherence.sh
- code/scripts/train_ppo_coherence_global.sh
- code/scripts/train_text_image_matching.sh
- code/scripts/train_text_image_matching_global.sh
- code/test/
- code/test/test_attr_img_matching.py
- code/test/test_img_attr.py
- code/test/test_ppo_coherence.py
- code/test/test_ppo_coherence_global.py
- code/test/test_ppo_rules.py
- code/test/test_txt_img_matching.py
- code/test/test_txt_img_matching_global.py
- code/train/
- code/train/train_img_attr.py
- code/train/train_ppo_coherence.py
- code/train/train_ppo_coherence_global.py
- code/train/train_txt_img_matching.py
- code/train/train_txt_img_matching_global.py
- code/train/trainer_img_attr.py
- code/train/trainer_ppo_coherence.py
- code/train/trainer_ppo_coherence_global.py
- code/train/trainer_ppo_rules.py
- code/train/trainer_txt_img_matching.py
- code/train/trainer_txt_img_matching_global.py
- code/utils/
- code/utils/config.py
- code/utils/optim.py
- code/utils/utils.py
- code/utils/vocab.py
