# Supplementary material
Source: ML conference proceedings conference paper supplement (https://openaccess.thecvf.com/content/ICCV2021/html/Cai_AskConfirm_Active_Detail_ICCV_2021_paper.html)
Supplement: Supplementary file 2 [file Cai_AskConfirm_Active_Detail_ICCV_2021_supplemental.zip › code/datasets/loader.py]

#!/usr/bin/env python

import os, sys, cv2, json

import random, pickle, math
import numpy as np
import os.path as osp
from PIL import Image
from time import time
from copy import deepcopy
from glob import glob
from nltk.tokenize import word_tokenize

from utils.config import get_train_config, get_test_config
from utils.utils import *
from datasets.caption_template import *
from datasets.vg import vg
from utils.vocab import Vocabulary

import torch
from torch.utils.data import Dataset
import torchvision.transforms as transforms


class caption_loader(Dataset):
    def __init__(self, imdb):
        self.cfg = imdb.cfg
        self.db = imdb
        # normalizer = transforms.Normalize(mean=[0.485, 0.456, 0.406], std=[0.229, 0.224, 0.225])
        # t_list = []
        # # if self.db.split in ['val', 'test']:
        # #     t_list = [transforms.Resize(256), transforms.CenterCrop(224)]
        # # else:
        # #     t_list = [transforms.RandomResizedCrop(224), transforms.RandomHorizontalFlip()]
        # t_list = [transforms.Resize((224, 224))]
        # t_end = [transforms.ToTensor(), normalizer]
        # self.transform = transforms.Compose(t_list + t_end)

    def __len__(self):
        return len(self.db.scenedb)

    def __getitem__(self, scene_index):
        scene = self.db.scenedb[scene_index]
        # image
        image_index = scene['image_index']
        resnet_path = self.db.resnet_path_from_index(image_index)
        image = torch.from_numpy(pickle_load(resnet_path)).squeeze().float()
        # image_path = self.db.color_path_from_index(image_index)
        # image = Image.open(image_path).convert('RGB')
        # image = self.transform(image)

        # captions
        if self.db.name == 'coco':
            all_captions = scene['captions']
        else:
            all_meta_regions = [scene['regions'][x] for x in sorted(list(scene['regions'].keys()))]
            all_captions = [x['caption'] for x in all_meta_regions]
        if self.db.split in ['val', 'test']:
            captions = tuple(all_captions[:self.cfg.max_turns])
            if self.cfg.negation > 0:
                temps = list(captions)[:(self.cfg.max_turns - 2 * self.cfg.negation)]
                negative_objects = scene['negative_objects']
                for x in sorted(list(negative_objects.keys()))[:self.cfg.negation]:
                    name = negative_objects[x]['name']
                    positive_cap = positive_object_templates[
                                       np.random.permutation(range(len(positive_object_templates)))[0]] % name
                    negative_cap = negative_object_templates[
                                       np.random.permutation(range(len(negative_object_templates)))[0]] % name
                    temps.append([positive_cap, negative_cap])
                captions = []
                for x in range(self.cfg.max_turns):
                    new_indices = np.random.permutation(range(len(temps)))
                    temps = [temps[y] for y in new_indices]
                    if isinstance(temps[0], list):
                        captions.append(temps[0][0])
                        temps[0] = temps[0][1]
                    else:
                        captions.append(temps[0])
                        temps = temps[1:]
                assert (len(temps) == 0)
                captions = tuple(captions)
        else:
            num_captions = len(all_captions)
            caption_inds = np.random.permutation(range(num_captions))
            captions = tuple([all_captions[x] for x in caption_inds[:self.cfg.max_turns]])
            if self.cfg.negation > 0:
                temps = list(captions)[:(self.cfg.max_turns - 2 * self.cfg.negation)]
                negative_objects = scene['negative_objects']
                for x in sorted(list(negative_objects.keys()))[:self.cfg.negation]:
                    name = negative_objects[x]['name']
                    positive_cap = positive_object_templates[
                                       np.random.permutation(range(len(positive_object_templates)))[0]] % name
                    negative_cap = negative_object_templates[
                                       np.random.permutation(range(len(negative_object_templates)))[0]] % name
                    temps.append([positive_cap, negative_cap])
                captions = []
                for x in range(self.cfg.max_turns):
                    new_indices = np.random.permutation(range(len(temps)))
                    temps = [temps[y] for y in new_indices]
                    if isinstance(temps[0], list):
                        captions.append(temps[0][0])
                        temps[0] = temps[0][1]
                    else:
                        captions.append(temps[0])
                        temps = temps[1:]
                assert (len(temps) == 0)
                captions = tuple(captions)

        sent_inds = []
        for i in range(self.cfg.max_turns):
            tokens = [w for w in word_tokenize(captions[i])]
            # tokens = further_token_process(tokens)
            word_inds = [self.db.lang_vocab(w) for w in tokens]
            word_inds.append(self.cfg.EOS_idx)
            sent_inds.append(torch.Tensor(word_inds))
        sent_inds = tuple(sent_inds)
        return image, sent_inds, captions, image_index, scene_index


def caption_collate_fn(data):
    images, sent_inds, captions, image_indices, scene_indices = zip(*data)
    images = torch.stack(images, 0)

    lengths = [len(sent_inds[i][j]) for i in range(len(sent_inds)) for j in range(len(sent_inds[0]))]
    max_length = max(lengths)
    new_sent_inds = torch.zeros(len(sent_inds), len(sent_inds[0]), max_length).long()
    new_sent_msks = torch.zeros(len(sent_inds), len(sent_inds[0]), max_length).long()
    for i in range(len(sent_inds)):
        for j in range(len(sent_inds[0])):
            end = len(sent_inds[i][j])
            new_sent_inds[i, j, :end] = sent_inds[i][j]
            new_sent_msks[i, j, :end] = 1

    entry = {
        'images': images,
        'sent_inds': new_sent_inds,
        'sent_msks': new_sent_msks,
        'captions': captions,
        'image_inds': image_indices,
        'scene_inds': scene_indices
    }

    return entry


class region_loader(Dataset):
    def __init__(self, imdb):
        self.cfg = imdb.cfg
        self.db = imdb
        self.obj_to_ind = imdb.class_to_ind
        # print(self.obj_to_ind)

    def __len__(self):
        return len(self.db.scenedb)

    def __getitem__(self, scene_index):
        scene = self.db.scenedb[scene_index]
        # print(scene['objects'])
        image_index = scene['image_index']

        # objects and attributes
        objs = [scene['objects'][obj]['name'] for obj in scene['objects'] if scene['objects'][obj]['name'] in self.obj_to_ind.keys()]
        atts = [scene['objects'][obj]['atts'] for obj in scene['objects'] if scene['objects'][obj]['name'] in self.obj_to_ind.keys()]
        objs = list(set(objs))
        objs_inds = list(set([self.obj_to_ind[obj] for obj in objs]))

        # region features
        region_path = self.db.region_path_from_index(image_index)
        with open(region_path, 'rb') as fid:
            regions = pickle.load(fid, encoding='latin1')
        region_boxes = torch.from_numpy(regions['region_boxes']).float()
        region_feats = torch.from_numpy(regions['region_feats']).float()
        region_clses = torch.from_numpy(regions['region_clses']).long()

        # captions
        if self.db.name == 'coco':
            all_captions = scene['captions']
        else:
            all_meta_regions = [scene['regions'][x] for x in sorted(list(scene['regions'].keys()))]
            all_captions = [x['caption'] for x in all_meta_regions]

        width = scene['width']
        height = scene['height']
        if self.db.split in ['val', 'test']:
            captions = all_captions[:self.cfg.max_turns]
            if self.cfg.negation > 0:
                temps = list(captions)[:(self.cfg.max_turns - 2 * self.cfg.negation)]
                negative_objects = scene['negative_objects']
                for x in sorted(list(negative_objects.keys()))[:self.cfg.negation]:
                    name = negative_objects[x]['name']
                    positive_cap = positive_object_templates[
                                       np.random.permutation(range(len(positive_object_templates)))[0]] % name
                    negative_cap = negative_object_templates[
                                       np.random.permutation(range(len(negative_object_templates)))[0]] % name
                    temps.append([positive_cap, negative_cap])
                captions = []
                for x in range(self.cfg.max_turns):
                    new_indices = np.random.permutation(range(len(temps)))
                    temps = [temps[y] for y in new_indices]
                    if isinstance(temps[0], list):
                        captions.append(temps[0][0])
                        temps[0] = temps[0][1]
                    else:
                        captions.append(temps[0])
                        temps = temps[1:]
                assert (len(temps) == 0)
                # captions = tuple(captions)
        else:
            num_captions = len(all_captions)
            caption_inds = np.random.permutation(range(num_captions))
            captions = [all_captions[x] for x in caption_inds[:self.cfg.max_turns]]
            if self.cfg.negation > 0:
                temps = list(captions)[:(self.cfg.max_turns - 2 * self.cfg.negation)]
                negative_objects = scene['negative_objects']
                for x in sorted(list(negative_objects.keys()))[:self.cfg.negation]:
                    name = negative_objects[x]['name']
                    positive_cap = positive_object_templates[
                                       np.random.permutation(range(len(positive_object_templates)))[0]] % name
                    negative_cap = negative_object_templates[
                                       np.random.permutation(range(len(negative_object_templates)))[0]] % name
                    temps.append([positive_cap, negative_cap])
                captions = []
                for x in range(self.cfg.max_turns):
                    new_indices = np.random.permutation(range(len(temps)))
                    temps = [temps[y] for y in new_indices]
                    if isinstance(temps[0], list):
                        captions.append(temps[0][0])
                        temps[0] = temps[0][1]
                    else:
                        captions.append(temps[0])
                        temps = temps[1:]
                assert (len(temps) == 0)
                # captions = tuple(captions)

        if self.cfg.paragraph_model:
            for i in range(1, len(captions)):
                captions[i] = captions[i - 1] + ';' + captions[i]

        if self.cfg.use_attr:
            captions = aug_txt_with_attr(captions, objs)

        captions = tuple(captions)

        sent_inds = []
        for i in range(self.cfg.max_turns):
            tokens = [w for w in word_tokenize(captions[i])]
            # tokens = further_token_process(tokens)
            word_inds = [self.db.lang_vocab(w) for w in tokens]
            word_inds.append(self.cfg.EOS_idx)
            sent_inds.append(torch.Tensor(word_inds))
        sent_inds = tuple(sent_inds)

        obj2word_inds = []
        for obj in objs:
            token = [w for w in word_tokenize(obj)]
            word_ind = [self.db.lang_vocab(w) for w in token]
            word_ind.append(self.cfg.EOS_idx)
            obj2word_inds.append(torch.Tensor(word_ind))
        obj2word_inds = tuple(obj2word_inds)
        return sent_inds, captions, region_boxes, region_feats, region_clses, objs, objs_inds, obj2word_inds, atts, width, height, image_index, scene_index


def region_collate_fn(data):
    sent_inds, captions, region_boxes, region_feats, region_clses, objs, objs_inds, obj2word_inds, atts, width, height, image_indices, scene_indices = zip(
        *data)

    # regions
    lengths = [region_boxes[i].size(0) for i in range(len(region_boxes))]
    max_length = max(lengths)

    new_region_boxes = torch.zeros(len(region_boxes), max_length, region_boxes[0].size(-1)).float()
    new_region_feats = torch.zeros(len(region_feats), max_length, region_feats[0].size(-1)).float()
    new_region_clses = torch.zeros(len(region_clses), max_length).long()
    new_region_masks = torch.zeros(len(region_clses), max_length).long()

    for i in range(len(region_boxes)):
        end = region_boxes[i].size(0)
        new_region_boxes[i, :end] = region_boxes[i]
        new_region_feats[i, :end] = region_feats[i]
        new_region_clses[i, :end] = region_clses[i]
        new_region_masks[i, :end] = 1.0

    # captions
    lengths = [len(sent_inds[i][j]) for i in range(len(sent_inds)) for j in range(len(sent_inds[0]))]
    max_length = max(lengths)
    new_sent_inds = torch.zeros(len(sent_inds), len(sent_inds[0]), max_length).long()
    new_sent_msks = torch.zeros(len(sent_inds), len(sent_inds[0]), max_length).long()
    for i in range(len(sent_inds)):
        for j in range(len(sent_inds[0])):
            end = len(sent_inds[i][j])
            new_sent_inds[i, j, :end] = sent_inds[i][j]
            new_sent_msks[i, j, :end] = 1

    # objects
    lengths = [len(objs_inds[i]) for i in range(len(objs_inds)) ]
    max_length = max(lengths)
    new_objs_inds = torch.zeros(len(objs_inds), max_length).long()
    new_objs_msks = torch.zeros(len(objs_inds), max_length).long()
    for i in range(len(objs_inds)):
        for j in range(len(objs_inds[i])):
            new_objs_inds[i, j] = objs_inds[i][j]
            new_objs_msks[i, j] = 1.0

    # objects to words
    # lengths = [len(obj) for obj in objs]
    # max_length = max(lengths)
    # print(max_length)
    new_obj2word_inds = torch.zeros(len(obj2word_inds), 50, 5).long()
    new_obj2word_msks = torch.zeros(len(obj2word_inds), 50, 5).long()
    for i in range(len(obj2word_inds)):
        for j in range(len(obj2word_inds[i])):
            end = len(obj2word_inds[i][j])
            new_obj2word_inds[i,j,:end] = obj2word_inds[i][j]
            new_obj2word_msks[i,j,:end] = 1.0

    entry = {
        'region_boxes': new_region_boxes,
        'region_feats': new_region_feats,
        'region_masks': new_region_masks,
        'region_clses': new_region_clses,
        'sent_inds': new_sent_inds,
        'sent_msks': new_sent_msks,
        'objs_inds': new_objs_inds,
        'objs_msks': new_objs_msks,
        'obj2word_inds': new_obj2word_inds,
        'obj2word_msks': new_obj2word_msks,
        'captions': captions,
        'objects': objs,
        'attributes': atts,
        'widths': width,
        'heights': height,
        'image_inds': image_indices,
        'scene_inds': torch.Tensor(scene_indices)
    }

    return entry


def test():
    config, unparsed = get_train_config()

    traindb = vg(config, 'train')
    train_loaddb = region_loader(traindb)
    train_loader = torch.utils.data.DataLoader(train_loaddb, batch_size=10, shuffle=False, collate_fn=region_collate_fn)
    print(len(train_loaddb))
    for data in train_loader:
        for key in data:
            print(key, data[key].shape if isinstance(data[key], torch.Tensor) else data[key])
            # pass
        # print(data['scene_inds'])

        # print(data['region_clses'])

if __name__ == '__main__':
    test()
