# Supplementary material
Source: ML conference proceedings conference paper supplement (https://openaccess.thecvf.com/content/ICCV2021/html/Cai_AskConfirm_Active_Detail_ICCV_2021_paper.html)
Supplement: Supplementary file 2 [file Cai_AskConfirm_Active_Detail_ICCV_2021_supplemental.zip › code/scripts/test_ppo_coherence_global.sh]

python test/test_ppo_coherence_global.py \
       --cuda \
       --num_workers=1 \
       --n_feature_dim=256 \
       --n_epochs=50 \
       --instance_dim=100 \
       --max_turns=10 \
       --test_turns=4 \
       --lr=1e-5 \
       --ppo_target_kl=0.7 \
       --ppo_num_actions=3 \
       --exp_name=ppo_coherence_global \
       --vg_img_feature=YOUR_PROJECT_PATH/data/caches/vg_test_img_feat_global.npy \
       --vg_img_logits=YOUR_PROJECT_PATH/data/caches/vg_test_img_logits.npy \
       --vg_attr_feature=YOUR_PROJECT_PATH/data/caches/vg_attr_feat.npy \
       --txt_img_matching_global_pretrained=YOUR_PROJECT_PATH/logs/text_image_matching_global_1029_104643/snapshots/49.pkl \
       --img_attr_pretrained=YOUR_PROJECT_PATH/logs/image_attribute_0907_162613/snapshots/49.pkl \
       --ppo_pretrained=YOUR_PROJECT_PATH/logs/ppo_coherence_global_1029_192006/snapshots/500.pkl \
       --pretrained=YOUR_PROJECT_PATH/logs/ppo_coherence_global_1029_192006/snapshots/500.pkl
