# Supplementary material
Source: ML conference proceedings conference paper supplement (https://openaccess.thecvf.com/content/ICCV2021/html/Cai_AskConfirm_Active_Detail_ICCV_2021_paper.html)
Supplement: Supplementary file 2 [file Cai_AskConfirm_Active_Detail_ICCV_2021_supplemental.zip › code/scripts/test_text_image_matching.sh]

python test/test_txt_img_matching.py \
       --cuda \
       --num_workers=1 \
       --n_feature_dim=256 \
       --max_turns=2 \
       --n_epochs=50 \
       --lr=5e-4 \
       --exp_name=text_image_matching_yf_nouns_single_1110_112017 \
       --txt_img_matching_pretrained=YOUR_PROJECT_PATH/logs/text_image_matching_yf_nouns_single_1110_112017/snapshots/28.pkl \
       --pretrained=YOUR_PROJECT_PATH/logs/text_image_matching_yf_nouns_single_1110_112017/snapshots/28.pkl
